# Supplementary material for: Local Coordination Environment of 3d and 4d Transition Metal Ions in LiCl-KCl Eutectic Mixture
Source: MDPI journal article supplement (doi:10.3390/ma15041478), 2022-02-16
Supplement: s1 [file s1]

Supplemental Information

# Local Coordination Environment of 3d and 4d Transition Metal Ions in LiCl-KCl Eutectic Mixture

Jon Fuller<sup>1,2</sup>, William Phillips<sup>1</sup>, Qi An<sup>2\*</sup>, and Ruchi Gakhar<sup>1\*</sup>

Idaho National Laboratory, Pyrochemistry and Molten Salt Systems Department, Idaho, NV 83415, USA; jon-fuller@nevada.unr.edu (J.F.); william.phillips@inl.gov (W.P.)

<sup>2</sup> Department of Chemical and Materials Engineering, University of Nevada, Reno, NV 89577, USA

\* Correspondence: qia@unr.edu (Q.A.); ruchi.gakhar@inl.gov (R.G.)

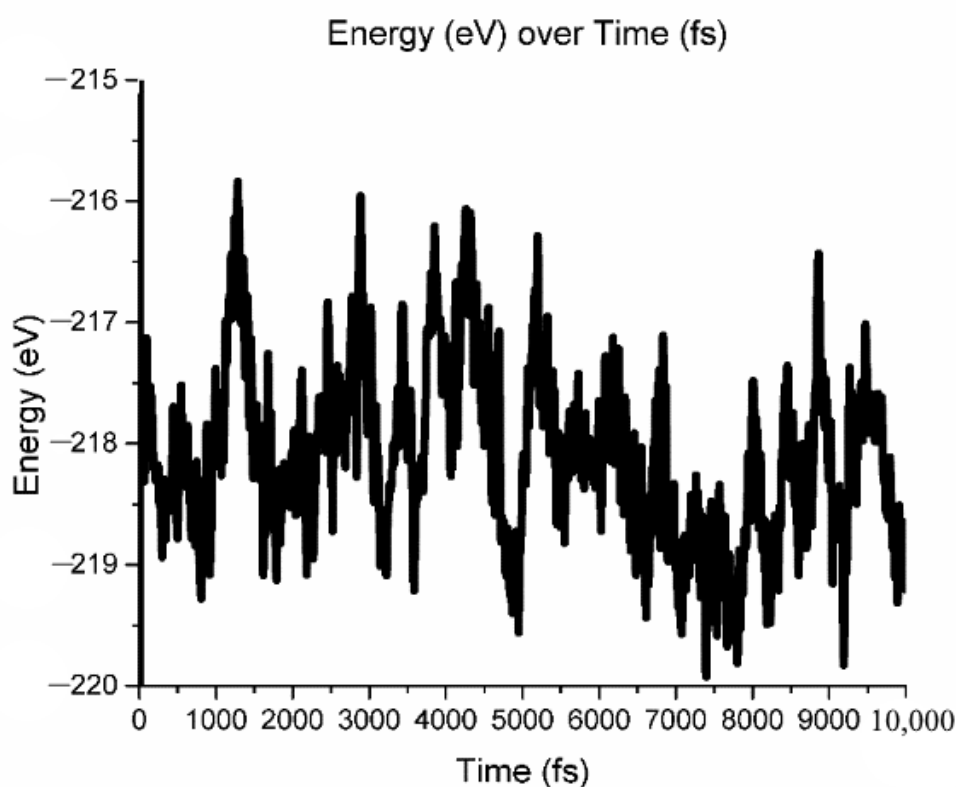

**Figure S1.** Energy convergence of Ni<sup>2+</sup> in the LiCl-KCl eutectic composition at the target temperature of 400 °C after an extended period of equilibration (only the final 10 ps are shown). Energy of system converged at average value of -218.2 eV.

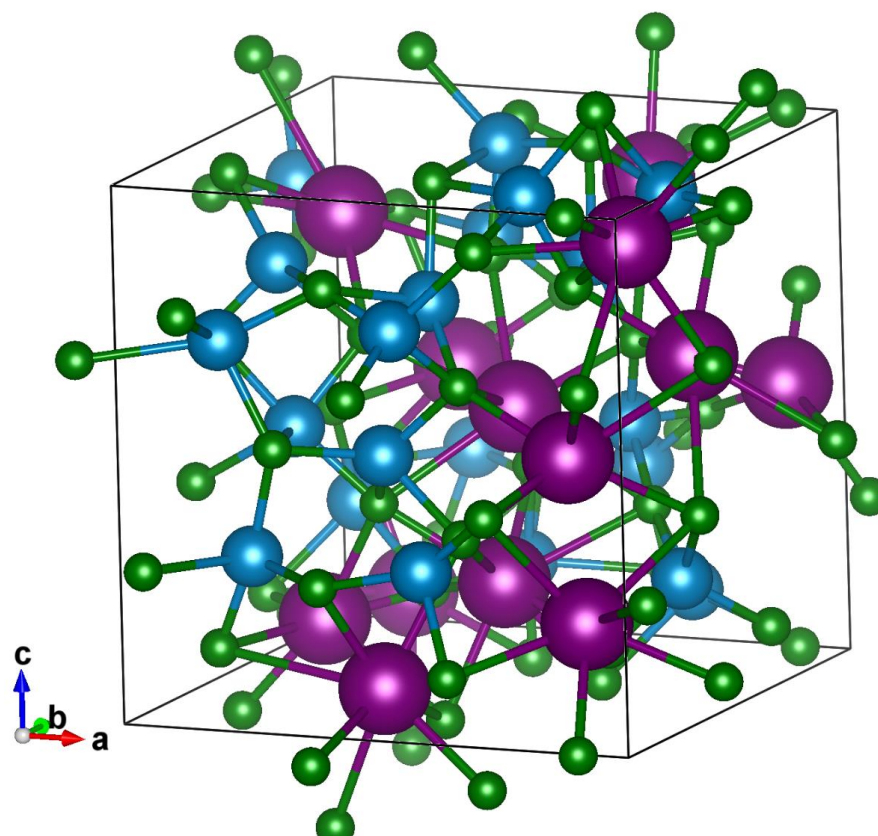

**Figure S2.** The computationally obtained LiCl-KCl eutectic composition from molecular dynamics simulations at 400 °C. Blue spheres, green spheres and purple spheres represent Li, Cl and K atoms, respectively.

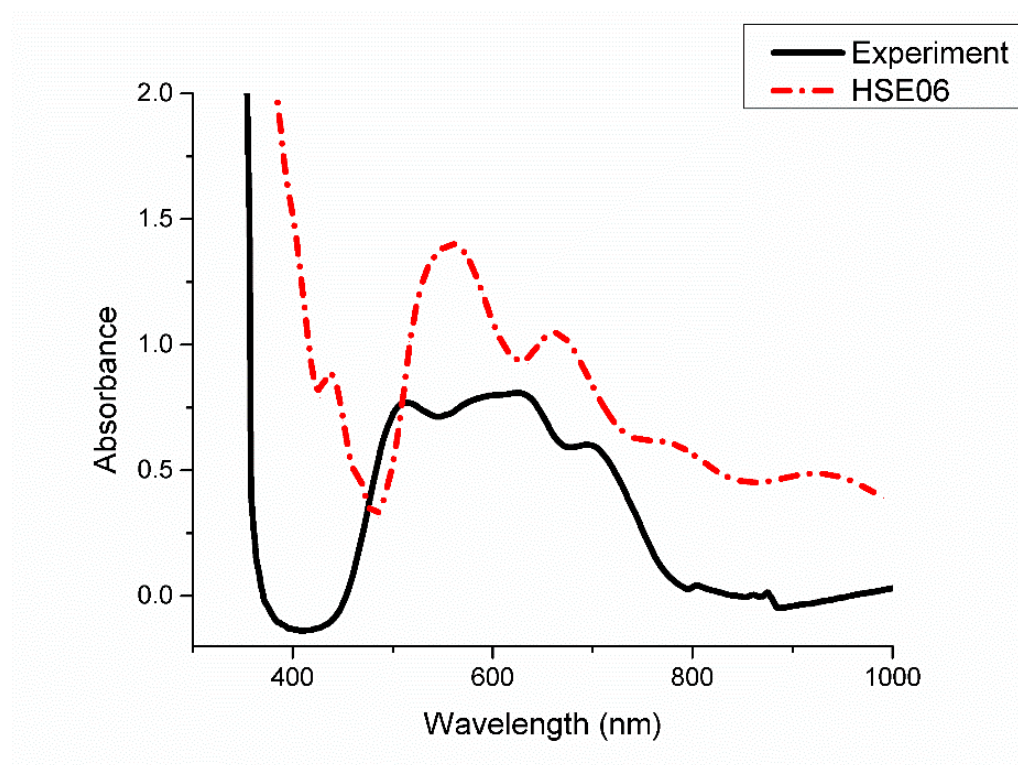

**Figure S3.** The computationally obtained  $\text{Ni}^{2+}$  spectrum obtained using the HSE-06 hybrid functional overlaid on the experimentally obtained  $\text{Ni}^{2+}$  optical spectrum at 400 °C.
